# Supplementary material for: Whole-brain connectivity atlas of glutamatergic and GABAergic neurons in the mouse dorsal and median raphe nuclei
Source: eLife. 2021 Nov 18;10:e65502. doi: 10.7554/eLife.65502 (PMC8626088; doi:10.7554/eLife.65502)
Supplement: Supplementary file 1. [file elife-65502-supp1.xlsx]

## Sheet: Nomenclature&abbreviations
Nomenclature and abbreviations of brain regions
	Brain region	Abbreviations	Notes
Isocortex	Frontal pole, cerebral cortex	FRP
	Somatomotor areas	MO
	Somatosensory areas	SS
	Gustatory areas	GU
	Visceral area	VISC
	Auditory areas	AUD
	Visual areas	VIS
	Anterior cingulate area	ACA
	Prelimbic area	PL
	Infralimbic area	ILA
	Orbital area	ORB
	Agranular insular area	AI
	Retrosplenial area	RSP
	Posterior parietal association areas	PTLp
	Temporal association areas	TEa
	Perirhinal area	PERI
	Ectorhinal area	ECT
Striatum (STR)	Striatum dorsal region	STRd
	Nucleus accumbens	ACB
	Fundus of striatum	FS
	Olfactory tubercle	OT
	Lateral septal complex	LSX
	Anterior amygdalar area	AAA
	Bed nucleus of the accessory olfactory tract	BA
	Central amygdalar nucleus	CEA
	Intercalated amygdalar nucleus	IA
	Medial amygdalar nucleus	MEA
	non-annotated area in STR	STR-NA
Pallidum (PAL)	Pallidum, dorsal region	PALd
	Substantia innominata	SI
	Magnocellular nucleus	MA
	Medial septal nucleus	MS
	Diagonal band nucleus	NDB
	Triangular nucleus of septum	TRS
	Bed nuclei of the stria terminalis	BST
	Bed nucleus of the anterior commissure	BAC
	non-annotated area in PAL	PAL-NA
Thalamus (TH)	Ventral group of the dorsal thalamus	VENT
	Subparafascicular nucleus	SPF
	Subparafascicular area	SPA
	Peripeduncular nucleus	PP
	Geniculate group, dorsal thalamus	GENd
	Lateral group of the dorsal thalamus	LAT
	Anterior group of the dorsal thalamus	ATN
	Medial group of the dorsal thalamus	MED
	Midline group of the dorsal thalamus	MTN
	Intralaminar nuclei of the dorsal thalamus	ILM
	Reticular nucleus of the thalamus	RT
	Geniculate group, ventral thalamus	GENv
	Medial habenula	MH
	Lateral habenula	LH
	non-annotated area in TH	TH-NA
Hypothalamus (HY)	Periventricular zone	PVZ
	Periventricular region	PVR
	Hypothalamic medial zone	MEZ
	Lateral hypothalamic area	LHA
	Lateral preoptic area	LPO
	Preparasubthalamic nucleus	PST
	Parasubthalamic nucleus	PSTN
	Retrochiasmatic area	RCH
	Subthalamic nucleus	STN
	Tuberal nucleus	TU
	Zona incerta	ZI
	non-annotated area in HY	HY-NA
Midbrain (MB)	Superior colliculus, sensory related	SCs
	Inferior colliculus	IC
	Nucleus of the brachium of the inferior colliculus	NB
	Nucleus sagulum	SAG
	Parabigeminal nucleus	PBG
	Midbrain trigeminal nucleus	MEV
	Substantia nigra, reticular part	SNr
	Ventral tegmental area	VTA
	Midbrain reticular nucleus, retrorubral area	RR
	Midbrain reticular nucleus	MRN
	Superior colliculus, motor related	SCm
	Periaqueductal gray	PAG
	Pretectal region	PRT
	Cuneiform nucleus	CUN
	Red nucleus	RN
	Oculomotor nucleus	III
	Edinger-Westphal nucleus	EW
	Trochlear nucleus	IV
	Ventral tegmental nucleus	VTN
	Anterior tegmental nucleus	AT
	Lateral terminal nucleus of the accessory optic tract	LT
	Substantia nigra, compact part	SNc
	Pedunculopontine nucleus	PPN
	Interfascicular nucleus raphe	IF
	Interpeduncular nucleus	IPN
	Rostral linear nucleus raphe	RL
	Central linear nucleus raphe	CLI
	Dorsal nucleus raphe	DR
	non-annotated area in MB	MB-NA
Pons (P)	Pons, sensory related	P-sen
	Pons, motor related	P-mot
	Superior central nucleus raphe	CS	Corresponds to MR
	Locus ceruleus	LC
	Laterodorsal tegmental nucleus	LDT
	Nucleus incertus	NI
	Pontine reticular nucleus	PRNr
	Nucleus raphe pontis	RPO
	Subceruleus nucleus	SLC
	Sublaterodorsal nucleus	SLD
	non-annotated area in P	P-NA
Medulla (MY)	Medulla, sensory related	MY-sen
	Medulla, motor related	MY-mot
	Medulla, behavioral state related	MY-sat
	non-annotated area in MY	MY-NA
Cerebellum (CB)	Vermal regions	VERM
	Hemispheric regions	HEM
	Fastigial nucleus	FN
	Interposed nucleus	IP
	Dentate nucleus	DN
Olfactory areas(OLF)
Hippocampal formation (HPF)
Cortical subplate (CTXsp)
fiber tracts
*Brain regions in gray color are merged to “Others” in quantification analysis.
