# Supplementary material for: Whole-brain connectivity atlas of glutamatergic and GABAergic neurons in the mouse dorsal and median raphe nuclei
Source: eLife. 2021 Nov 18;10:e65502. doi: 10.7554/eLife.65502 (PMC8626088; doi:10.7554/eLife.65502)
Supplement: Supplementary file 2. [file elife-65502-supp2.xlsx]

## Sheet: Number of inputs
brain region		Inputs to DR GLU				Inputs to DR GABA				Inputs to MR GLU				Inputs to MR GABA
		Dataset 1	Dataset 2	Dataset 3	Dataset 4	Dataset 1	Dataset 2	Dataset 3	Dataset 4	Dataset 1	Dataset 2	Dataset 3	Dataset 4	Dataset 1	Dataset 2	Dataset 3	Dataset 4
Isocortex	MO	308	269	188	127	377	371	322	501	659	614	168	272	135	225	99	43
	SS	12	27	25	13	61	77	77	213	80	119	23	27	20	40	6	1
	ACA	56	86	34	44	99	102	146	173	535	599	111	307	32	181	35	16
	PL	74	79	80	54	111	126	75	106	123	99	25	48	19	34	25	7
	ILA	53	46	40	25	83	83	76	115	209	175	46	20	14	46	44	16
	ORB	215	130	94	30	73	201	338	427	278	471	88	47	59	91	57	19
	AI	204	155	98	48	130	170	112	199	118	75	32	14	43	57	41	27
	RSP	13	20	8	6	28	17	50	154	506	441	112	160	14	148	24	8
STR	STRd	83	127	19	17	209	249	129	304	377	74	46	79	75	58	58	9
	ACB	271	167	161	65	448	360	270	552	768	210	84	63	275	661	514	151
	LSX	18	41	33	12	89	59	47	93	164	71	30	23	27	89	37	12
	CEA	179	176	207	180	387	483	245	590	132	24	21	14	82	50	45	22
	STR-NA	133	111	55	56	161	156	105	223	110	41	23	25	45	60	38	6
PAL	SI	526	319	298	161	719	655	499	873	678	397	175	182	398	614	432	140
	MA	159	71	47	31	130	117	125	198	118	118	37	42	81	51	46	24
	MS	23	11	19	11	46	21	43	45	172	111	41	21	13	118	38	6
	NDB	70	33	38	16	59	62	94	139	308	295	52	90	71	201	83	34
	BST	429	290	430	179	684	826	681	1063	390	144	75	32	207	429	207	64
	PAL-NA	174	107	90	68	203	206	167	348	228	113	45	72	102	210	99	61
TH	VENT	118	66	107	64	285	176	154	431	144	221	65	222	40	51	32	13
	MED	32	18	4	16	65	19	17	31	23	9	4	12	18	9	40	17
	MTN	16	23	17	13	70	53	50	65	48	13	11	11	6	14	13	3
	MH	14	1	15	4	30	3	119	77	95	203	39	21	48	470	84	18
	LH	354	219	172	95	568	574	758	735	1571	1525	538	748	1228	2715	1481	676
	TH-NA	263	263	266	173	771	642	594	1502	507	620	164	383	140	318	136	37
HY	PVZ	76	77	113	50	229	252	265	441	86	18	16	7	31	74	29	6
	PVR	404	447	535	266	1118	1109	1339	1671	794	417	144	144	368	940	380	176
	MEZ	746	674	676	415	1551	1616	2190	2960	1892	1983	557	655	829	1752	781	263
	LHA	1469	1157	1246	745	2563	2171	2444	3716	2335	1623	603	609	998	1904	906	385
	LPO	264	158	185	95	345	331	400	599	718	491	154	217	351	853	463	127
	PSTN	95	81	81	65	199	213	239	310	80	20	16	9	57	54	23	14
	TU	76	57	66	56	210	164	206	313	119	51	29	5	74	129	41	19
	ZI	252	271	261	141	587	546	531	1744	837	1080	313	551	104	288	104	28
	HY-NA	685	654	677	422	1530	1443	1686	2801	1150	939	287	269	408	928	391	142
MB	SNr	572	429	123	170	478	214	199	282	679	428	254	230	297	595	136	99
	VTA	1361	920	642	669	1546	966	1159	1217	1087	665	441	433	690	838	627	247
	RR	619	467	254	329	627	476	502	729	662	573	206	260	424	638	330	135
	MRN	4208	3325	2846	2016	5627	5395	4056	6711	2729	2686	940	1150	1370	2292	1354	618
	SCm	2023	2046	1991	798	3333	3812	2961	10005	3001	3760	1039	1683	581	1082	408	152
	PAG	7223	6142	5296	4049	10316	9772	8088	12200	5828	5217	1909	2527	2156	4522	2383	956
	PRT	95	115	107	35	235	206	186	687	252	373	93	292	45	87	28	10
	CUN	168	168	274	87	333	434	348	636	164	130	48	88	67	189	71	34
	RN	70	49	129	30	218	210	136	255	42	67	20	35	20	17	16	7
	VTN	8	2	5	3	5	9	15	17	23	27	11	30	29	63	34	10
	SNc	352	284	92	163	300	161	154	162	317	157	111	90	164	278	116	81
	PPN	510	303	298	211	661	596	554	833	564	595	162	263	369	670	293	130
	IPN	48	14	30	17	78	66	552	255	1608	1248	619	680	553	1591	785	165
	CLI	254	120	106	140	306	226	336	383	327	127	65	87	276	415	457	272
	DR	/	/	/	/	/	/	/	/	1111	654	336	259	506	875	817	410
	MB-NA	2949	2249	1996	1352	3894	3392	3273	6533	2878	2504	904	1349	1828	2929	1819	843
P	P-sen	994	822	774	521	1885	1772	1322	2014	1059	570	153	307	687	1389	517	251
	P-mot	2527	1617	1311	1004	2906	2908	3810	3991	5025	5828	2030	3431	1783	5036	1689	470
	MR	582	263	266	209	779	696	1632	1081	/	/	/	/	/	/	/	/
	LDT	391	178	126	124	292	313	416	382	457	773	229	456	266	752	355	72
	NI	191	96	68	60	161	234	474	280	507	681	186	621	309	962	351	91
	PRNr	1167	694	668	439	1296	1235	1508	2076	3437	3331	1329	2569	986	2393	773	234
	RPO	26	11	9	5	32	23	58	36	80	50	14	57	33	65	27	5
	SLD	207	84	84	49	161	172	152	239	172	289	87	104	125	172	90	31
	P-NA	1996	1141	1034	652	2367	2078	2758	3287	3541	3651	1290	2176	1899	3869	1803	659
MY	MY-sen	38	42	18	13	78	54	31	131	49	28	22	27	16	16	10	4
	MY-mot	1561	1061	956	536	2263	2079	1915	3985	2466	2235	1084	1313	519	808	343	106
	MY-sat	297	252	195	153	381	350	382	582	338	349	97	169	224	429	156	61
	MY-NA	552	454	382	214	793	881	796	1612	956	880	445	439	240	386	125	46
CB	FN	173	36	23	9	46	91	70	165	220	268	111	50	34	62	27	2
	IP	49	31	29	14	68	68	65	351	83	108	24	46	210	463	77	9
	DN	146	92	36	34	178	114	80	347	154	190	58	107	108	271	71	40
	OLF	115	125	64	49	106	92	106	226	177	63	24	52	27	77	72	22
	HPF	3	6	31	6	7	13	9	6	52	31	13	22	1	12	4	1
	CTXsp	119	91	60	58	86	65	61	151	89	46	64	26	37	58	54	29
	fiber tracts	2040	1362	1422	918	2755	2315	2559	4492	3013	2886	1010	1625	1692	3343	1617	689
	Others	863	821	822	484	1609	1608	1420	4224	1138	960	294	446	495	930	421	194

## Sheet: Quantification of inputs
brain region		Inputs to DR GLU						Inputs to DR GABA						Inputs to MR GLU						Inputs to MR GABA
		Dataset 1	Dataset 2	Dataset 3	Dataset 4	mean	s.e.m.	Dataset 1	Dataset 2	Dataset 3	Dataset 4	mean	s.e.m.	Dataset 1	Dataset 2	Dataset 3	Dataset 4	mean	s.e.m.	Dataset 1	Dataset 2	Dataset 3	Dataset 4	mean	s.e.m.
Isocortex	MO	0.00727084	0.0083171	0.00649351	0.00655213	0.00715839	0.000424742	0.00623924	0.00653756	0.00567541	0.00531424	0.00594161	0.000275106	0.010868	0.0109973	0.00844391	0.00941176	0.00993023	0.000612091	0.00529869	0.00429095	0.00394611	0.00439898	0.00448368	0.00028832
	SS	0.000283279	0.000834802	0.000863498	0.000670691	0.000663068	0.00013353	0.00100953	0.00135685	0.00135716	0.00225935	0.00149572	0.000267393	0.00131933	0.00213139	0.00115601	0.000934256	0.00138525	0.000260932	0.000784991	0.000762835	0.000239158	0.000102302	0.000472321	0.000176409
	ACA	0.00132197	0.002659	0.00117436	0.00227003	0.00185634	0.000361254	0.00163842	0.00179739	0.00257332	0.00183506	0.00196105	0.000208492	0.008823	0.0107286	0.00557901	0.0106228	0.00893836	0.00120212	0.00125599	0.00345183	0.00139509	0.00163683	0.00193493	0.000511716
	PL	0.00174689	0.00244257	0.00276319	0.00278595	0.00243465	0.000242286	0.00183702	0.0022203	0.00132191	0.00112437	0.0016259	0.000248634	0.00202846	0.00177318	0.00125653	0.0016609	0.00167977	0.000160675	0.000745741	0.000648409	0.000996492	0.000716113	0.000776689	7.60463e-05
	ILA	0.00125115	0.00142226	0.0013816	0.00128979	0.0013362	3.96376e-05	0.00137363	0.00146258	0.00133954	0.00121984	0.0013489	5.02328e-05	0.00344674	0.0031344	0.00231202	0.000692042	0.0023963	0.000616429	0.000549494	0.00087726	0.00175383	0.00163683	0.00120435	0.000292231
	ORB	0.00507542	0.00401942	0.00324675	0.00154775	0.00347234	0.000742973	0.00120813	0.00354191	0.00595742	0.0045293	0.00380919	0.000998766	0.00458466	0.00843602	0.004423	0.0016263	0.00476749	0.00139873	0.00231572	0.00173545	0.002272	0.00194373	0.00206673	0.000138145
	AI	0.00481575	0.00479238	0.00338491	0.0024764	0.00386736	0.00057174	0.00215146	0.00299565	0.00197406	0.00211085	0.002308	0.000232334	0.00194601	0.00134332	0.00160836	0.000484429	0.00134553	0.000312404	0.00168773	0.00108704	0.00163425	0.00276215	0.00179279	0.000350465
	RSP	0.000306886	0.000618372	0.000276319	0.00030955	0.000377782	8.05502e-05	0.000463392	0.000299565	0.000881275	0.00163352	0.000819438	0.000297712	0.00834474	0.0078987	0.00562927	0.00553633	0.00685226	0.000738799	0.000549494	0.00282249	0.000956633	0.000818414	0.00128676	0.000518841
STR	STRd	0.00195935	0.00392666	0.000656259	0.000877057	0.00185483	0.000746995	0.00345889	0.00438774	0.00227369	0.00322461	0.00333623	0.000434183	0.00621733	0.0013254	0.00231202	0.00273356	0.00314708	0.0010651	0.00294372	0.00110611	0.00231186	0.000920716	0.0018206	0.000485027
	ACB	0.00639739	0.0051634	0.00556093	0.00335345	0.0051188	0.000642178	0.00741427	0.00634372	0.00475888	0.00585521	0.00609302	0.000551138	0.0126655	0.00376128	0.00422195	0.00217993	0.00570718	0.00236031	0.0107936	0.0126058	0.0204879	0.0154476	0.0148337	0.00211408
	LSX	0.000424919	0.00126766	0.00113982	0.000619099	0.000862875	0.00020244	0.00147292	0.00103967	0.000828398	0.000986476	0.00108187	0.000137856	0.00270462	0.00127167	0.00150784	0.000795848	0.00156999	0.000406154	0.00105974	0.00169731	0.00147481	0.00122762	0.00136487	0.000139805
	CEA	0.00422558	0.00544167	0.00714977	0.00928649	0.00652588	0.00109837	0.00640474	0.00851116	0.00431825	0.00625829	0.00637311	0.000856734	0.00217689	0.000429861	0.00105549	0.000484429	0.00103667	0.000405549	0.00321846	0.000953543	0.00179369	0.00225064	0.00205408	0.000472
	STR-NA	0.00313968	0.00343196	0.0018997	0.00288913	0.00284012	0.000332517	0.0026645	0.00274895	0.00185068	0.00236542	0.00240739	0.00020299	0.00181407	0.000734346	0.00115601	0.000865052	0.00114237	0.000240617	0.00176623	0.00114425	0.00151467	0.000613811	0.00125974	0.000250347
PAL	SI	0.0124171	0.00986303	0.0102929	0.00830625	0.0102198	0.000847661	0.0118992	0.0115421	0.00879512	0.00926014	0.0103741	0.000786567	0.0111813	0.00711062	0.00879574	0.00629758	0.00834631	0.00107871	0.0156213	0.0117095	0.0172194	0.0143223	0.0147181	0.00116478
	MA	0.00375345	0.00219522	0.00162338	0.00159934	0.00229285	0.000505968	0.00215146	0.00206171	0.00220319	0.00210024	0.00212915	3.07724e-05	0.00194601	0.00211348	0.00185967	0.00145329	0.00184311	0.000140216	0.00317921	0.000972614	0.00183355	0.00245524	0.00211015	0.000468373
	MS	0.000542952	0.000340105	0.000656259	0.000567508	0.000526706	6.67912e-05	0.000761287	0.000370051	0.000757896	0.000477327	0.00059164	9.9411e-05	0.00283655	0.00198811	0.00206072	0.000726644	0.001903	0.000436602	0.000510244	0.00225036	0.00151467	0.000613811	0.00122227	0.000410251
	NDB	0.00165246	0.00102031	0.00131252	0.000825466	0.00120269	0.000180258	0.000976433	0.00109253	0.0016568	0.00147441	0.00130004	0.000159547	0.00507941	0.00528371	0.00261359	0.00311419	0.00402272	0.000678095	0.00278672	0.00383324	0.00330835	0.00347826	0.00335164	0.000217751
	BST	0.0101272	0.00896639	0.0148522	0.0092349	0.0107952	0.0013749	0.01132	0.0145553	0.012003	0.0112755	0.0122885	0.000773742	0.00643172	0.00257917	0.0037696	0.00110727	0.00347194	0.00112685	0.00812466	0.0081814	0.00825096	0.00654731	0.00777608	0.000410403
	PAL-NA	0.00410755	0.00330829	0.00310859	0.00350823	0.00350817	0.000215807	0.00335959	0.00363002	0.00294346	0.00369133	0.0034061	0.00017022	0.00376008	0.00202393	0.00226176	0.00249135	0.00263428	0.000387207	0.00400345	0.00400488	0.00394611	0.00624041	0.00454871	0.000564065
TH	VENT	0.00278558	0.00204063	0.00369577	0.00330186	0.00295596	0.000357519	0.00471667	0.00310138	0.00271433	0.00457173	0.00377603	0.000508291	0.00237479	0.0039583	0.00326699	0.00768166	0.00432044	0.00116634	0.00156998	0.000972614	0.00127551	0.00132992	0.00128701	0.000122777
	MED	0.000755412	0.000556535	0.00013816	0.000825466	0.000568893	0.000154462	0.00107573	0.000334808	0.000299633	0.000328825	0.000509749	0.000188817	0.000379306	0.000161198	0.000201045	0.000415225	0.000289194	6.3349e-05	0.000706492	0.000171638	0.00159439	0.00173913	0.00105291	0.000372015
	MTN	0.000377706	0.000711128	0.000587179	0.000670691	0.000586676	7.42829e-05	0.00115848	0.000933937	0.000881275	0.000689472	0.000915791	9.64533e-05	0.000791596	0.000232841	0.000552875	0.000380623	0.000489484	0.000120072	0.000235497	0.000266992	0.000518176	0.000306905	0.000331893	6.379e-05
	MH	0.000330493	3.09186e-05	0.000518099	0.000206366	0.000271469	0.000102637	0.000496491	5.28644e-05	0.00209743	0.000816759	0.000865887	0.000439373	0.0015667	0.00363591	0.00196019	0.000726644	0.00197236	0.000611277	0.00188398	0.00896331	0.00334821	0.00184143	0.00400923	0.00168809
	LH	0.00835674	0.00677117	0.00594087	0.0049012	0.0064925	0.000729702	0.00940024	0.0101147	0.0133601	0.00779634	0.0101679	0.00116928	0.0259083	0.0273141	0.0270406	0.0258824	0.0265363	0.000374315	0.0481984	0.0517774	0.0590322	0.069156	0.057041	0.00462452
	TH-NA	0.00620854	0.00813159	0.00918762	0.00892535	0.00811327	0.000673426	0.0127598	0.011313	0.0104695	0.0159321	0.0126186	0.00120147	0.00836123	0.0111047	0.00824286	0.0132526	0.0102404	0.00120215	0.00549494	0.00606454	0.00542092	0.00378517	0.00519139	0.000490295
HY	PVZ	0.0017941	0.00238073	0.00390301	0.00257958	0.00266436	0.000445275	0.00378988	0.00444061	0.00467076	0.0046778	0.00439476	0.000209018	0.00141828	0.000322396	0.000804182	0.000242215	0.000696767	0.00027063	0.00121674	0.00141124	0.00115593	0.000613811	0.00109943	0.000170784
	PVR	0.00953707	0.0138206	0.0184789	0.0137234	0.01389	0.00182661	0.0185026	0.0195422	0.0236005	0.0177247	0.0198425	0.00130682	0.0130943	0.00746884	0.00723764	0.0049827	0.00819587	0.00172641	0.0144438	0.0179266	0.0151467	0.0180051	0.0163806	0.00092659
	MEZ	0.0176105	0.0208391	0.023349	0.0214105	0.0208023	0.00119179	0.0256686	0.0284763	0.0385998	0.0313975	0.0310356	0.00277944	0.0312021	0.0355173	0.0279956	0.0226644	0.0293448	0.00270797	0.0325379	0.0334122	0.0311304	0.0269054	0.0309965	0.00144241
	LHA	0.0346781	0.0357728	0.0430368	0.0384357	0.0379809	0.00186084	0.0424169	0.0382562	0.0430767	0.0394166	0.0407916	0.00116126	0.0385078	0.0290694	0.0303076	0.0210727	0.0297394	0.00356803	0.039171	0.0363109	0.0361129	0.0393862	0.0377453	0.000887294
	LPO	0.00623215	0.00488514	0.00638989	0.0049012	0.00560209	0.000410575	0.00570965	0.0058327	0.0070502	0.00635375	0.00623658	0.000305024	0.011841	0.00879424	0.00774025	0.00750865	0.00897102	0.000996707	0.0137766	0.0162674	0.018455	0.0129923	0.0153729	0.00124215
	PSTN	0.00224263	0.00250441	0.00279773	0.00335345	0.00272456	0.000238325	0.00329339	0.00375337	0.00421249	0.00328825	0.00363688	0.000220685	0.00131933	0.000358218	0.000804182	0.000311419	0.000698286	0.000234915	0.00223722	0.00102983	0.000916773	0.00143223	0.00140401	0.00029895
	TU	0.0017941	0.00176236	0.00227964	0.00288913	0.00218131	0.000263964	0.00347544	0.00288992	0.00363085	0.00332007	0.00332907	0.000159539	0.0019625	0.000913455	0.00145758	0.00017301	0.00112664	0.000383301	0.00290447	0.00246014	0.00163425	0.00194373	0.00223565	0.000280567
	ZI	0.00594887	0.00837894	0.00901492	0.00727442	0.00765429	0.000672632	0.00971468	0.00962131	0.00935914	0.0184991	0.0117986	0.00223477	0.0138035	0.0193437	0.0157318	0.0190657	0.0169862	0.0013412	0.00408195	0.00549241	0.00414541	0.00286445	0.00414606	0.000536912
	HY-NA	0.0161705	0.0202208	0.0233835	0.0217717	0.0203866	0.00154657	0.0253211	0.0254278	0.0297166	0.029711	0.0275441	0.00125285	0.0189653	0.0168183	0.014425	0.00930796	0.0148791	0.00207568	0.0160138	0.0176978	0.0155851	0.0145269	0.0159559	0.000659361
MB	SNr	0.013503	0.0132641	0.00424841	0.00877057	0.00994651	0.0021891	0.00791076	0.00377099	0.00350747	0.00299125	0.00454512	0.00113351	0.0111978	0.00766585	0.0127664	0.00795848	0.00989713	0.00124704	0.0116571	0.0113472	0.00542092	0.0101279	0.00963827	0.00144401
	VTA	0.0321286	0.0284451	0.0221746	0.0345148	0.0293158	0.00268787	0.0255859	0.0170223	0.0204279	0.012909	0.0189863	0.00268364	0.0179263	0.0119107	0.0221653	0.0149827	0.0167463	0.00218424	0.0270822	0.0159814	0.024992	0.0252685	0.023331	0.00249335
	RR	0.0146125	0.014439	0.00877314	0.0169736	0.0136996	0.00174091	0.0103767	0.00838781	0.008848	0.0077327	0.00883629	0.000562136	0.0109174	0.0102629	0.0103538	0.00899654	0.0101327	0.000405434	0.0166418	0.0121672	0.0131537	0.0138107	0.0139434	0.000960793
	MRN	0.0993367	0.102804	0.0983006	0.104009	0.101113	0.00136352	0.0931252	0.0950678	0.071489	0.0711854	0.0827168	0.0065823	0.0450055	0.0481086	0.0472457	0.0397924	0.0450381	0.00186682	0.0537719	0.0437104	0.05397	0.0632225	0.0536687	0.0039848
	SCm	0.0477562	0.0632594	0.068769	0.0411701	0.0552387	0.00646345	0.0551602	0.067173	0.0521891	0.106126	0.070162	0.0124177	0.0494912	0.0673449	0.0522216	0.0582353	0.0568232	0.00395425	0.022804	0.0206347	0.0162628	0.0155499	0.0188128	0.0017416
	PAG	0.170511	0.189902	0.182923	0.208894	0.188058	0.00801992	0.170727	0.172197	0.142555	0.129409	0.153722	0.0105922	0.0961129	0.093441	0.0959489	0.0874394	0.0932356	0.00202647	0.084622	0.0862385	0.0949857	0.0978005	0.0909117	0.00323332
	PRT	0.00224263	0.00355564	0.00369577	0.00180571	0.00282494	0.000471716	0.00388918	0.00363002	0.00327834	0.00728719	0.00452118	0.000930459	0.00415588	0.00668076	0.00467431	0.0101038	0.00640369	0.00134818	0.00176623	0.00165917	0.00111607	0.00102302	0.00139112	0.000187907
	CUN	0.00396591	0.00519432	0.00946394	0.00448847	0.00577816	0.00125411	0.00551106	0.00764771	0.00613367	0.00674622	0.00650966	0.000455494	0.00270462	0.00232841	0.00241255	0.00304498	0.00262264	0.000162225	0.00262972	0.00360439	0.00283004	0.00347826	0.0031356	0.000239177
	RN	0.00165246	0.00151501	0.00445565	0.00154775	0.00229272	0.000721573	0.00360784	0.00370051	0.00239707	0.00270485	0.00310257	0.000325158	0.000692646	0.00120003	0.00100523	0.00121107	0.00102724	0.000121136	0.000784991	0.000324205	0.000637755	0.000716113	0.000615766	0.000101734
	VTN	0.000188853	6.18372e-05	0.0001727	0.000154775	0.000144541	2.84328e-05	8.27486e-05	0.000158593	0.000264382	0.000180324	0.000171512	3.73591e-05	0.000379306	0.000483594	0.000552875	0.00103806	0.000613459	0.00014596	0.00113824	0.00120146	0.00135523	0.00102302	0.00117949	6.92535e-05
	SNc	0.00830953	0.00878088	0.00317767	0.00840943	0.00716938	0.00133443	0.00496491	0.00283705	0.00271433	0.00171838	0.00305867	0.000682998	0.00522783	0.00281201	0.00557901	0.00311419	0.00418326	0.00071078	0.00643693	0.0053017	0.00462372	0.00828645	0.0061622	0.000800794
	PPN	0.0120394	0.00936833	0.0102929	0.0108858	0.0106466	0.000559473	0.0109394	0.0105024	0.00976452	0.00883585	0.0100105	0.000460529	0.00930125	0.010657	0.00814234	0.00910035	0.00930023	0.000518122	0.0144831	0.0127775	0.0116789	0.0132992	0.0130597	0.000582357
	IPN	0.00113312	0.00043286	0.0010362	0.000877057	0.000869808	0.000154918	0.00129088	0.00116302	0.00972927	0.00270485	0.003722	0.00203266	0.0265185	0.0223528	0.0311118	0.0235294	0.0258781	0.00195247	0.021705	0.0303417	0.0312899	0.0168798	0.0250541	0.00347467
	CLI	0.00599608	0.00371023	0.00366123	0.00722282	0.00514759	0.000880426	0.00506421	0.00398245	0.00592217	0.00406258	0.00475785	0.000459541	0.00539275	0.00227468	0.00326699	0.00301038	0.0034862	0.0006694	0.0108329	0.00791441	0.0182159	0.0278261	0.0161973	0.00444116
	DR	0	0	0	0	0	0	0	0	0	0	0	0	0.0183221	0.0117137	0.0168878	0.00896194	0.0139714	0.00219139	0.0198603	0.016687	0.0325654	0.0419437	0.0277641	0.00584014
	MB-NA	0.0696159	0.0695359	0.0689417	0.0697518	0.0694613	0.000178857	0.0644446	0.059772	0.0576882	0.0692973	0.0628005	0.00258551	0.0474628	0.0448488	0.0454363	0.0466782	0.0461065	0.000591414	0.0717482	0.0558586	0.0725048	0.0862404	0.071588	0.00621138
P	P-sen	0.023465	0.0254151	0.0267339	0.0268792	0.0256233	0.000791227	0.0311962	0.0312252	0.0233009	0.021363	0.0267713	0.00259343	0.0174646	0.0102092	0.00768999	0.0106228	0.0114967	0.00209221	0.0269644	0.0264894	0.0206075	0.0256777	0.0249348	0.00146669
	P-mot	0.0596539	0.0499954	0.0452818	0.051798	0.0516823	0.00299126	0.0480935	0.0512432	0.0671531	0.0423336	0.0522058	0.00531288	0.0828702	0.104385	0.102031	0.11872	0.102001	0.00736651	0.0699819	0.0960409	0.067323	0.0480818	0.0703569	0.00985389
	MR	0.0137391	0.00813159	0.00918762	0.0107826	0.0104602	0.00122123	0.0128922	0.0122645	0.0287648	0.0114665	0.016347	0.00414953	0	0	0	0	0	0	0	0	0	0	0	0
	LDT	0.00923019	0.00550351	0.00435203	0.00639736	0.00637077	0.00104101	0.00483252	0.00551552	0.00733221	0.00405198	0.00543305	0.000700095	0.00753665	0.0138451	0.0115099	0.0157785	0.0121675	0.00177321	0.0104404	0.0143413	0.0141502	0.00736573	0.0115744	0.00166557
	NI	0.00450886	0.00296818	0.00234872	0.0030955	0.00323032	0.000456325	0.0026645	0.00412342	0.00835448	0.00297003	0.00452811	0.00131357	0.00836123	0.0121973	0.00934861	0.0214879	0.0128488	0.00299232	0.0121281	0.0183462	0.0139908	0.00930946	0.0134436	0.0018964
	PRNr	0.0275489	0.0214575	0.0230727	0.0226487	0.023682	0.00133356	0.0214484	0.0217625	0.0265792	0.0220207	0.0229527	0.00121449	0.0566816	0.0596611	0.0667973	0.0888927	0.0680082	0.0072778	0.0387001	0.0456366	0.0308115	0.0239386	0.0347717	0.00471272
	RPO	0.000613772	0.000340105	0.000310859	0.000257958	0.000380673	7.95372e-05	0.000529591	0.000405293	0.00102228	0.000381862	0.000584756	0.000149399	0.00131933	0.000895544	0.000703659	0.00197232	0.00122271	0.000281025	0.00129524	0.00123961	0.00107621	0.000511509	0.00103064	0.000179177
	SLD	0.00488657	0.00259716	0.00290135	0.00252799	0.00322827	0.000558683	0.0026645	0.00303089	0.00267908	0.00253514	0.0027274	0.000106208	0.00283655	0.00517624	0.00437274	0.00359862	0.00399604	0.000503085	0.00490619	0.00328019	0.00358737	0.00317136	0.00373628	0.000399795
	P-NA	0.0471188	0.0352781	0.0357143	0.0336377	0.0379372	0.003093	0.0391732	0.0366174	0.0486111	0.0348661	0.0398169	0.00306186	0.0583967	0.0653926	0.0648372	0.0752941	0.0659801	0.00348701	0.0745349	0.0737852	0.071867	0.0674169	0.071901	0.00159677
MY	MY-sen	0.000897052	0.00129858	0.000621719	0.000670691	0.00087201	0.000154317	0.00129088	0.000951559	0.00054639	0.00138955	0.00104459	0.000190725	0.000808087	0.000501505	0.00110575	0.000934256	0.000837399	0.000127501	0.000627993	0.000305134	0.000398597	0.000409207	0.000435233	6.8375e-05
	MY-mot	0.0368499	0.0328046	0.0330202	0.0276531	0.032582	0.00188748	0.037452	0.036635	0.0337528	0.04227	0.0375274	0.00176874	0.0406682	0.0400308	0.0544833	0.0454325	0.0451537	0.0033352	0.0203705	0.0154093	0.0136719	0.010844	0.0150739	0.00200051
	MY-sat	0.00701117	0.00779149	0.00673529	0.00789351	0.00735786	0.000286175	0.00630544	0.00616751	0.00673294	0.00617343	0.00634483	0.000133229	0.00557415	0.0062509	0.00487535	0.00584775	0.00563704	0.000289445	0.0087919	0.0081814	0.00621811	0.00624041	0.00735796	0.000663476
	MY-NA	0.0130309	0.014037	0.0131943	0.0110406	0.0128257	0.00063455	0.0131239	0.0155245	0.0140299	0.0170989	0.0149443	0.000872205	0.015766	0.0157616	0.0223663	0.0151903	0.017271	0.00170379	0.00941989	0.00736135	0.00498246	0.00470588	0.0066174	0.00110809
CB	FN	0.00408395	0.00111307	0.000794418	0.000464324	0.00161394	0.000833918	0.000761287	0.00160355	0.00123378	0.0017502	0.00133721	0.000220583	0.00362815	0.00480011	0.00557901	0.0017301	0.00393434	0.000837005	0.00133448	0.00118239	0.00107621	0.000204604	0.000949423	0.000253867
	IP	0.00115672	0.000958476	0.00100166	0.000722282	0.000959785	8.98831e-05	0.00112538	0.00119826	0.00114566	0.00372315	0.00179811	0.000641863	0.0013688	0.00193437	0.00120627	0.0015917	0.00152529	0.000157591	0.00824241	0.00882981	0.0030692	0.000920716	0.00526553	0.00194223
	DN	0.00344657	0.00284451	0.00124344	0.00175411	0.00232216	0.000501951	0.00294585	0.00200885	0.00141004	0.00368072	0.00251136	0.000501798	0.0025397	0.00340307	0.00291516	0.00370242	0.00314009	0.000257622	0.00423895	0.00516821	0.00283004	0.00409207	0.00408232	0.000480623
	OLF	0.00271476	0.00386482	0.00221056	0.00252799	0.00282953	0.000360447	0.00175427	0.00162117	0.0018683	0.00239724	0.00191025	0.000170004	0.00291901	0.00112839	0.00120627	0.00179931	0.00176324	0.000413356	0.00105974	0.00146846	0.0028699	0.00225064	0.00191218	0.000403663
	HPF	7.08199e-05	0.000185512	0.00107074	0.00030955	0.000409155	0.00022585	0.000115848	0.000229079	0.000158629	6.36436e-05	0.0001418	3.49795e-05	0.000857562	0.000555237	0.000653398	0.000761246	0.000706861	6.55214e-05	3.92495e-05	0.00022885	0.000159439	0.000102302	0.00013246	4.04317e-05
	CTXsp	0.00280919	0.00281359	0.0020724	0.00299231	0.00267187	0.000204327	0.00142328	0.00114539	0.00107516	0.0016017	0.00131138	0.000122528	0.00146775	0.0008239	0.00321673	0.000899654	0.00160201	0.000557083	0.00145223	0.00110611	0.00215242	0.00296675	0.00191938	0.000411393
	fiber tracts	0.0481575	0.0421111	0.0491158	0.0473611	0.0466864	0.0015667	0.0455945	0.0407937	0.0451036	0.0476478	0.0447849	0.00144	0.0496891	0.0516908	0.050764	0.0562284	0.0520931	0.00143782	0.0664102	0.0637539	0.0644531	0.0704859	0.0662758	0.00151177
	Others	0.0203725	0.0253842	0.0283918	0.0249703	0.0247797	0.0016551	0.0266285	0.0283353	0.0250282	0.0448051	0.0311993	0.00458526	0.0187674	0.0171944	0.0147768	0.0154325	0.0165428	0.000900226	0.0194285	0.0177359	0.0167809	0.0198465	0.018448	0.000719002

## Sheet: Comparison of inputs
Comparsion of whole-brain inputs (p-value, One-way ANOVA followed by multiple comparison with Tukey’s test)
	DR GLU vs DR GABA	MR GLU vs MR GABA	DR GLU vs MR GLU	DR GABA vs MR GABA
MO	0.22849	5.03702e-06	0.00276579	0.121773
SS	0.0775695	0.0496121	0.140387	0.0265143
ACA	0.999523	5.4219e-05	4.85771e-05	0.999993
PL	0.0532411	0.0293839	0.0743353	0.041306
ILA	0.999993	0.117892	0.181731	0.990291
ORB	0.993959	0.229281	0.765577	0.572806
AI	0.0619804	0.845945	0.00295951	0.784665
RSP	0.911879	1.4225e-05	2.92128e-06	0.897901
STRd	0.500073	0.586121	0.605503	0.481661
ACB	0.973958	0.00924404	0.99396	0.0123572
LSX	0.92161	0.934199	0.233336	0.848838
CEA	0.998928	0.782852	0.00131555	0.00821146
STR-NA	0.654262	0.988301	0.00295212	0.0391501
SI	0.99948	0.00301636	0.551726	0.0379544
MA	0.987126	0.948475	0.803519	0.999979
MS	0.99872	0.426993	0.0343104	0.489197
NDB	0.997696	0.601928	0.000926761	0.010553
BST	0.715784	0.0418583	0.00105206	0.0323132
PAL-NA	0.997192	0.0146442	0.376669	0.180741
VENT	0.818196	0.0316415	0.492451	0.0857964
MED	0.997582	0.12924	0.814987	0.360797
MTN	0.101657	0.625988	0.873621	0.00335735
MH	0.967546	0.43725	0.580398	0.129707
LH	0.711106	6.38286e-06	0.000390139	6.28931e-08
TH-NA	0.0250253	0.0122835	0.419991	0.000628615
PVZ	0.0061539	0.768354	0.00233026	2.09898e-05
PVR	0.0640829	0.0101173	0.0789142	0.393049
MEZ	0.0253315	0.946894	0.0663232	0.999999
LHA	0.790496	0.0868879	0.0762183	0.748875
LPO	0.948425	0.000780481	0.0615188	2.77726e-05
PSTN	0.0967492	0.242611	0.000473822	0.000195938
TU	0.0596847	0.0704011	0.0885074	0.0752044
ZI	0.197037	0.000126474	0.00208614	0.00912415
HY-NA	0.0223479	0.953624	0.0875661	0.000623471
SNr	0.119772	0.999387	0.999996	0.149993
VTA	0.0565215	0.299786	0.0189092	0.627356
RR	0.0298185	0.100168	0.130944	0.0223853
MRN	0.0313171	0.45682	2.16578e-06	0.00126322
SCm	0.499869	0.0147182	0.998651	0.00163186
PAG	0.0193535	0.995011	2.60563e-06	0.000166435
PRT	0.523331	0.0065562	0.0515579	0.0965917
CUN	0.87166	0.949748	0.0296789	0.0199625
RN	0.511904	0.886856	0.17366	0.00446211
VTN	0.995664	0.00226787	0.00914256	1.08113e-05
SNc	0.036157	0.456819	0.154389	0.133707
PPN	0.832079	0.00153078	0.324605	0.00755278
IPN	0.804579	0.993487	2.21299e-05	0.000106087
CLI	0.999349	0.00969471	0.954934	0.0192114
DR	/	/	/	/
MB-NA	0.525903	0.00088497	0.00182577	0.303055
P-sen	0.971105	0.00128848	0.000845424	0.896219
P-mot	0.99994	0.0301816	0.00112859	0.290655
MR	/	/	/	/
LDT	0.96109	0.9895	0.0477961	0.0350823
NI	0.961588	0.995977	0.0173811	0.0274723
PRNr	0.999402	0.00092289	6.59751e-05	0.283453
RPO	0.865486	0.884568	0.0343134	0.371479
SLD	0.841417	0.972524	0.600214	0.383195
P-NA	0.966705	0.498234	9.23924e-05	2.44767e-05
MY-sen	0.826439	0.242251	0.998092	0.0453243
MY-mot	0.46859	5.08969e-06	0.0115747	9.75116e-05
MY-sat	0.313726	0.041115	0.0411269	0.313655
MY-NA	0.578785	0.000139415	0.0749541	0.00125326
FN	0.988245	0.0221345	0.0830753	0.969069
IP	0.936996	0.0974564	0.979017	0.132559
DN	0.990232	0.473281	0.584488	0.11373
OLF	0.297693	0.990123	0.193116	1
HPF	0.43111	0.0249323	0.343969	0.999937
CTXsp	0.0894538	0.926023	0.218753	0.653444
fiber tracts	0.803902	0.000107359	0.0990852	1.52416e-06
Others	0.314474	0.948041	0.146487	0.0166105
