# Supplementary material for: Whole-brain connectivity atlas of glutamatergic and GABAergic neurons in the mouse dorsal and median raphe nuclei
Source: eLife. 2021 Nov 18;10:e65502. doi: 10.7554/eLife.65502 (PMC8626088; doi:10.7554/eLife.65502)
Supplement: Supplementary file 3. [file elife-65502-supp3.xlsx]

## Sheet: Labeled neurons
		Outputs of DR GLU				Outputs of DR GABA				Outputs of MR GLU				Outputs of MR GABA
		Dataset 1	Dataset 2	Dataset 3	Dataset 4	Dataset 1	Dataset 2	Dataset 3	Dataset 4	Dataset 1	Dataset 2	Dataset 3	Dataset 4	Dataset 1	Dataset 2	Dataset 3	Dataset 4
	Number of Labeled neurons in injection region	427	2123	504	550	740	283	1115	624	1490	1451	918	620	2751	2000	1554	3706
	Percentage of labeled neurons in injection region	0.0871	0.4331	0.1028	0.1122	0.1142	0.0437	0.1721	0.0963	0.581	0.5658	0.358	0.2418	0.122	0.0887	0.0689	0.1644

## Sheet: Signal volume of outputs
brain region		Outputs of DR GLU (×1000 μm3)				Outputs of DR GABA (×1000 μm3)				Outputs of MR GLU (×1000 μm3)				Outputs of MR GABA (×1000 μm3)
		Dataset 1	Dataset 2	Dataset 3	Dataset 4	Dataset 1	Dataset 2	Dataset 3	Dataset 4	Dataset 1	Dataset 2	Dataset 3	Dataset 4	Dataset 1	Dataset 2	Dataset 3	Dataset 4
Isocortex	MO	1.759	26.564	13.524	1.904	2.149	0	0	0	0.334	0	0	2.232	0.32	0.008	0.29	6.29
	SS	0	1.183	0	0.039	0	0	0	0	0	0	0	0	0	0	0	0.016
	ACA	1.843	32.04	9.327	0.072	0.325	0	0	0	0	3.637	0	7.508	2.867	0	0.01	8.875
	PL	2.166	6.793	8.045	0.002	0.246	0	0	0	0.071	0	0	3.517	0.319	0.06	0.071	0.275
	ILA	4.751	5.153	8.451	0	1.425	0	0	0	0	1.462	0	3.681	0.368	1.026	2.643	16.25
	ORB	2.258	14.753	5.308	0.056	0.199	0	0	0	1.734	0	0	1.91	0.354	1.208	0	8.394
	AI	9.501	14.086	2.034	2.327	0	0	0	0	0.293	0	0	0	0.767	0.004	0	0.502
	RSP	0	2.012	0.453	0	0	0	0	0.443	0	0	0	0	4.812	0.012	0	24.11
STR	STRd	0.349	0.131	4.948	0	0.739	0.375	0.043	11.661	0.311	0	0	2.134	0.133	0.028	0.204	1.22
	ACB	17.383	70.853	34.104	14.22	23.88	16.621	17.277	88.182	59.44	5.436	3.081	10.123	26.859	3.128	39.822	86.084
	LSX	1.573	8.911	6.396	0.641	2.114	0.132	0.534	6.897	372.149	7.696	14.137	110.603	55.168	27.195	101.863	379.627
	CEA	2.169	14.178	3.577	0.495	58.049	20.961	0.449	270.747	0.236	0	0	0.191	0.391	0	16.689	21.031
	STR-NA	3.695	20.773	17.084	2.914	13.295	6.708	2.376	61.809	80.837	10.608	3.2	13.038	19.634	12.089	19.609	61.572
PAL	SI	40.508	86.303	60.861	16.371	42.786	37.005	16.547	150.379	900.103	86.929	61.017	281.386	82.285	22.728	253.231	357.669
	MA	0	5.521	0	0.61	0.004	0	0.155	0.472	12.964	3.294	3.791	0.299	4.636	3.168	3.291	4.095
	MS	0	0	0	0	0	0	0.03	2.471	1095.66	87.202	46.471	563.273	94.967	29.759	224.923	585.019
	NDB	0.1	9.174	0.001	0.419	9.636	5.485	7.964	2.679	990.034	154.319	150.415	109.557	283.851	53.984	94.266	459.563
	BST	8.214	17.073	13.365	0.688	24.615	45.589	3.733	113.297	565.086	6.74	10.116	215.665	19.498	19.332	67.456	248.267
	PAL-NA	8.181	21.389	9.448	1.1	12.236	10.744	8.562	30.308	320.724	43.324	20.418	109.418	33.695	14.681	61.047	172.686
TH	VENT	0	3.375	3.459	0.001	11.25	0.983	5.553	48.529	225.89	15.238	9.868	3.234	15.328	2.851	29.935	112.675
	MED	0	0.099	0	0	11.607	1.79	0.684	127.561	1060.68	35.984	23.258	74.973	38.307	24.896	43.653	194.028
	MTN	0	0	0	0	9.542	3.206	0.241	161.175	312.103	16.744	6.61	81.92	42.285	15.86	22.783	311.687
	MH	0	0	0	0	0	0	0	0.01	67.19	13.231	1.715	48.814	13.159	5.786	6.716	49.02
	LH	0	0	0	0	0	0	0	0.59	2587.04	97.671	98.782	316.22	40.78	23.305	20.55	214.888
	TH-NA	0.17	3.244	3.122	1.031	37.819	5.193	15.134	178.245	874.725	79.554	42.144	110.432	104.173	46.484	98.913	658.753
HY	PVZ	0	0.066	0	0	1.854	0.487	0.553	10.635	17.056	1.138	0.172	5.733	29.071	23.13	34.395	215.237
	PVR	0	6.49	0	0.275	45.916	19.378	2.777	183.817	1241.23	164.279	84.059	893.959	540.534	322.522	931.026	4076.18
	MEZ	8.602	19.156	2.972	6.691	11.44	15.126	13.336	300.958	1503.08	258.867	105.378	503.749	1633.46	491.923	1055.59	3219.08
	LHA	95.459	253.161	92.867	78.695	214.353	106.91	40.609	431.795	6002.41	1017.6	464.684	2518.65	1521.13	826.526	1909.23	5881.37
	LPO	14.207	27.267	8.507	7.846	17.092	1.91	8.395	24.96	2339.03	382.638	160.64	1319.29	289.648	127.723	600.577	1660.1
	PSTN	0.061	2.273	0	0.205	4.124	7.178	1.209	7.36	15.542	5.745	1.586	8.027	5.114	4.754	21.639	48.507
	TU	0	2.247	0	0	11.287	17.987	0.036	44.784	196.268	11.746	25.951	23.206	121.265	109.402	80.144	252.393
	ZI	0.093	4.788	0.786	7.415	14.908	19.362	2.612	81.597	178.906	6.39	7.767	8.939	16.086	3.909	31.555	137.331
	HY-NA	9.583	63.715	11.069	17.436	139.409	62.312	23.117	272.129	1886.19	280.559	132.038	657.847	912.319	345.455	784.683	2449.2
MB	SNr	0	0.007	0	0.61	0.041	0	0.053	0.19	8.922	0.187	0.196	1.954	66.023	8.821	11.504	16.941
	VTA	17.897	118.222	29.981	17.181	14.043	25.325	16.276	26.78	1813.92	379.273	271.106	637.212	1154.55	296.757	1221.28	3242.99
	RR	0.002	1.815	0.984	0	11.832	5.599	0.353	23.59	49.365	2.278	1.331	0.607	22.508	9.211	90.78	126.829
	MRN	12.834	58.548	39.255	5.648	282.622	136.36	57.667	383.29	905.836	257.991	120.193	340.268	301.531	86.66	540.471	1233.42
	SCm	0	0.201	0.021	0	0.51	0.252	22.27	273.363	6.251	0.04	0	0.642	10.128	1.656	2.572	31.887
	PAG	341.605	210.529	313.207	52.386	954.756	190.377	447.485	2275.57	1096.81	86.088	141.075	256.39	517.885	142.337	967.109	2649.03
	PRT	0	0.493	0	0	0.666	0.066	2.968	9.547	15.834	0.15	0	0.714	2.715	2.299	2.463	21.559
	CUN	0.02	0.003	0.333	0	0.441	0	0	16.149	2.276	0	0	0	3.192	0.355	6.511	18.788
	RN	0.88	1.207	0.046	0	16.146	19.288	38.891	33.523	40.674	2.16	5.063	2.286	21.927	3.85	43.418	88.479
	VTN	0	0.048	0.002	0	0	0	0	0	126.913	82.967	27.597	50.879	11.761	47.886	61.642	142.847
	SNc	0	0.232	0.119	0.051	2.064	0.904	0.043	4.97	22.474	1.322	1.774	2.066	24.931	13.498	25.157	34.02
	PPN	1.583	5.857	0.335	0	0.096	0.094	0.14	7.123	30.306	5.309	11.062	6.6	27.909	12.531	64.142	129.485
	IPN	0	0.246	0	1.733	0	0	0	0.4	1597.13	333.91	205.542	614.518	7729.25	760.576	7752.39	31254.1
	CLI	40.485	34.923	30.377	16.654	0.362	0	0.696	2.165	193.703	51.592	29.889	564.73	109.56	32.893	433.176	811.945
	DR	/	/	/	/	/	/	/	/	82.129	66.472	29.011	240.381	167.434	35.707	394.062	544.254
	MB-NA	155.265	89.714	83.913	37.607	171.585	48.278	94.285	261.69	3119.48	531.788	249.592	1277.47	617.077	293.642	1360.64	3282.35
P	P-sen	0	7.812	1.878	0	28.922	12.069	0	24.273	5.324	0	0	0.289	9.274	3.353	8.167	54.617
	P-mot	10.26	34.356	5.339	0	3.336	4.634	6.661	16.678	2203.14	615.373	589.361	436.412	1940.06	466.007	848.795	2408.23
	MR	0.901	4.87	3.006	0	0	0	0	0.006	/	/	/	/	/	/	/	/
	LDT	7.396	2.196	0.069	0	0.136	0	0.533	0.381	25.85	6.741	14.33	5.363	96.198	15.637	93.043	208.143
	NI	0.108	1.152	0	0	0	0	1.042	0.099	443.564	242.554	137.143	113.445	395.379	129.722	499.245	434.523
	PRNr	3.689	13.957	9.579	0.625	0	0	0.116	3.643	1140.1	215.01	213.763	200.273	864.146	136.233	445.303	1898.03
	RPO	0.568	0.117	0	0	0	0	0	0	53.92	120.32	16.584	62.684	62.265	48.202	52.267	46.67
	SLD	0	3.478	0.164	0	0	0	0.029	0.71	7.154	5.543	9.226	2.643	6.531	2.867	5.9	16.431
	P-NA	52.415	36.151	9.534	0	13.601	1.738	4.521	26.013	2044.57	666.625	663.491	889.305	1341.53	538.748	1371.89	2173.93
MY	MY-sen	0	0.917	0.024	0	0	0	0	0	0.935	0.173	0.706	0	0.056	0	0	0
	MY-mot	1.016	98.567	15.031	0	0.145	0	0	1.856	62.966	73.867	74.307	5.417	13.492	1.716	18.198	53.307
	MY-sat	0.27	1.64	2.477	0	0	0	0	1.265	12.81	13.457	30.892	1.529	15.287	0.072	10.57	36.341
	MY-NA	0.057	54.662	9.766	0	0.796	0.003	0	0.18	61.028	65.392	36.066	0.411	11.746	0.672	5.263	23.268
CB	FN	0	0	0	0	0	0	0	0	0	0	0	0	0	0	0	0
	IP	0	0	0	0	0	0	0	0	0	0	0	0	0	0	0	0
	DN	0	0	0	0	0	0	0	0	0	0	0	0	0	0	0	0
	OLF	26.88	103.33	70.979	8.803	4.423	0.069	0	13.826	47.332	3.575	0.128	17.951	34.885	16.255	9.356	12.749
	HPF	0	4.56	0.379	0.121	0.171	0	0	2.614	8.165	0	0	9.451	0.575	0.109	0.972	35.2
	CTXsp	24.545	133.47	6.126	1.427	5.147	0.658	0	38.942	2.771	0	0.01	1.349	0.366	0	0.201	15.09
	fiber tracts	155.234	167.258	138.745	54.676	32.289	15.108	38.521	126.539	4394.95	919.439	484.474	1717.37	1015.91	351.246	980.49	2786.95
	Others	20.96	63.723	24.743	7.597	76.544	30.076	20.538	336.277	941.061	91.65	59.771	210.7	160.904	58.285	258.106	597.248

## Sheet: Quantification of outputs
brain region		Outputs of DR GLU						Outputs of DR GABA						Outputs of MR GLU						Outputs of MR GABA
		Dataset 1	Dataset 2	Dataset 3	Dataset 4	mean	s.e.m.	Dataset 1	Dataset 2	Dataset 3	Dataset 4	mean	s.e.m.	Dataset 1	Dataset 2	Dataset 3	Dataset 4	mean	s.e.m.	Dataset 1	Dataset 2	Dataset 3	Dataset 4	mean	s.e.m.
Isocortex	MO	0.00158827	0.0133017	0.012117	0.00519407	0.00805026	0.00279928	0.000917211	0	0	0	0.000229303	0.000229303	7.68258e-06	0	0	0.000142339	3.75055e-05	3.49915e-05	1.40904e-05	1.31563e-06	1.20123e-05	8.2382e-05	2.74501e-05	1.85232e-05
	SS	0	0.000592379	0	0.000106391	0.000174693	0.000141469	0	0	0	0	0	0	0	0	0	0	0	0	0	0	0	2.09557e-07	5.23892e-08	5.23892e-08
	ACA	0.00166412	0.0160438	0.00835663	0.000196414	0.00656524	0.0036244	0.000138713	0	0	0	3.46782e-05	3.46782e-05	0	0.000476092	0	0.000478801	0.000238723	0.000137828	0.000126241	0	4.14218e-07	0.000116238	6.07234e-05	3.49988e-05
	PL	0.00195577	0.00340155	0.00720801	5.45595e-06	0.00314269	0.00152329	0.000104995	0	0	0	2.62487e-05	2.62487e-05	1.63312e-06	0	0	0.000224287	5.64799e-05	5.59369e-05	1.40463e-05	9.86722e-06	2.94095e-06	3.60176e-06	7.61406e-06	2.65184e-06
	ILA	0.00428986	0.00258033	0.00757177	0	0.00361049	0.00158772	0.000608202	0	0	0	0.00015205	0.00015205	0	0.000191379	0	0.000234745	0.000106531	6.21395e-05	1.62039e-05	0.000168729	0.000109478	0.000212831	0.000126811	4.25157e-05
	ORB	0.00203884	0.00738746	0.00475576	0.000152767	0.00358371	0.00158115	8.49348e-05	0	0	0	2.12337e-05	2.12337e-05	3.9885e-05	0	0	0.000121805	4.04225e-05	2.87102e-05	1.55875e-05	0.00019866	0	0.000109939	8.10465e-05	4.61168e-05
	AI	0.00857882	0.00705347	0.00182238	0.006348	0.00595067	0.0014527	0	0	0	0	0	0	6.73951e-06	0	0	0	1.68488e-06	1.68488e-06	3.37728e-05	6.57815e-07	0	6.57484e-06	1.02514e-05	7.97863e-06
	RSP	0	0.0010075	0.00040587	0	0.000353341	0.000238114	0	0	0	6.78913e-05	1.69728e-05	1.69728e-05	0	0	0	0	0	0	0.000211884	1.97344e-06	0	0.000315776	0.000132408	7.87851e-05
STR	STRd	0.000315126	6.55973e-05	0.00443322	0	0.00120348	0.00107871	0.000315411	0.000418368	4.64858e-05	0.00178709	0.000641838	0.000389715	7.15354e-06	0	0	0.00013609	3.58108e-05	3.34688e-05	5.8563e-06	4.6047e-06	8.45004e-06	1.59787e-05	8.72244e-06	2.54784e-06
	ACB	0.0156958	0.0354792	0.0305559	0.0387918	0.0301307	0.0051004	0.0101922	0.0185432	0.0186776	0.0135142	0.0152318	0.00206532	0.00136722	0.000711586	0.00062865	0.000645565	0.000838256	0.000177228	0.00118267	0.000514411	0.0016495	0.00112747	0.00111851	0.000232931
	LSX	0.00142032	0.00446212	0.00573057	0.00174863	0.00334041	0.00104847	0.000902272	0.000147266	0.000577289	0.00105699	0.000670954	0.000201154	0.00856007	0.00100743	0.00288452	0.00705339	0.00487635	0.00176175	0.00242918	0.00447232	0.00421935	0.00497209	0.00402323	0.000553886
	CEA	0.00195847	0.00709954	0.00320485	0.00135035	0.0034033	0.00129111	0.0247758	0.0233851	0.000485398	0.0414929	0.0225348	0.00842284	5.42841e-06	0	0	1.21805e-05	4.40222e-06	2.89127e-06	1.72167e-05	0	0.000691288	0.000275449	0.000245988	0.000161247
	STR-NA	0.00333636	0.0104019	0.0153066	0.00794933	0.00924855	0.00249453	0.00567441	0.00748377	0.00256861	0.00947244	0.00629981	0.00146573	0.00185939	0.00138861	0.000652931	0.000831461	0.0011831	0.00027452	0.000864531	0.00198808	0.00081224	0.000806426	0.00111782	0.000290381
PAL	SI	0.0365762	0.0432156	0.0545291	0.0446597	0.0447452	0.00370589	0.0182614	0.0412846	0.0178884	0.0230461	0.0251201	0.00551461	0.0207039	0.0113792	0.01245	0.0179446	0.0156194	0.00222268	0.0036232	0.0037377	0.0104893	0.0046845	0.00563367	0.00163591
	MA	0	0.0027646	0	0.00166407	0.00110717	0.000677549	1.70723e-06	0	0.000167565	7.23356e-05	6.0402e-05	3.94966e-05	0.000298195	0.000431193	0.000773519	1.90679e-05	0.000380493	0.000156642	0.000204134	0.000520989	0.000136319	5.36334e-05	0.000228769	0.000102151
	MS	0	0	0	0	0	0	0	0	3.24319e-05	0.000378689	0.00010278	9.22868e-05	0.0252022	0.011415	0.00948198	0.0359211	0.0205051	0.00621729	0.00418162	0.00489398	0.00931671	0.00766216	0.00651362	0.00119854
	NDB	9.02939e-05	0.00459382	8.95961e-07	0.00114302	0.00145701	0.00107728	0.00411272	0.00611933	0.0086096	0.000410566	0.00481305	0.00173187	0.0227725	0.0202007	0.0306908	0.00698669	0.0201627	0.00492663	0.0124986	0.00887787	0.00390466	0.00601903	0.00782505	0.00186149
	BST	0.00741674	0.00854919	0.0119745	0.00187685	0.00745432	0.00209644	0.0105059	0.0508613	0.00403561	0.0173632	0.0206915	0.0104182	0.012998	0.000882283	0.00206408	0.0137534	0.00742443	0.00344787	0.000858543	0.00317922	0.00279415	0.00325163	0.00252088	0.000563134
	PAL-NA	0.00738694	0.0107104	0.00846504	0.00300077	0.00739079	0.0016188	0.00522242	0.0119865	0.00925608	0.00464481	0.00777746	0.00173792	0.00737721	0.00567122	0.0041661	0.00697782	0.00604809	0.000725423	0.00148367	0.00241434	0.00252867	0.00226172	0.0021721	0.000235902
TH	VENT	0	0.00169001	0.00309913	2.72798e-06	0.00119797	0.000748345	0.00480159	0.00109668	0.00600315	0.00743724	0.00483467	0.00135746	0.00519586	0.00199469	0.00201347	0.000206239	0.00235257	0.00103819	0.000674928	0.000468857	0.00123996	0.00147574	0.000964871	0.000235718
	MED	0	4.95736e-05	0	0	1.23934e-05	1.23934e-05	0.00495396	0.00199701	0.000739448	0.0195492	0.0068099	0.00433732	0.0243976	0.0047104	0.00474558	0.00478119	0.00965869	0.00491299	0.00168675	0.00409424	0.00180818	0.00254124	0.0025326	0.000553702
	MTN	0	0	0	0	0	0	0.0040726	0.00357677	0.000260537	0.0247006	0.00815263	0.00558052	0.00717891	0.00219183	0.00134871	0.00522421	0.00398592	0.00135099	0.00186191	0.00260824	0.000943712	0.00408226	0.00237403	0.000663386
	MH	0	0	0	0	0	0	0	0	0	1.53253e-06	3.83134e-07	3.83134e-07	0.00154549	0.00173197	0.00034993	0.00311297	0.00168509	0.00056592	0.000579422	0.000951529	0.000278189	0.000642029	0.000612792	0.000138043
	LH	0	0	0	0	0	0	0	0	0	9.04195e-05	2.26049e-05	2.26049e-05	0.0595063	0.0127854	0.0201556	0.020166	0.0281533	0.0105946	0.00179564	0.00383259	0.000851217	0.00281445	0.00232348	0.000643211
	TH-NA	0.0001535	0.00162441	0.00279719	0.00281254	0.00184691	0.000629327	0.0161415	0.00579356	0.0163608	0.0273167	0.0164031	0.00439449	0.0201202	0.0104138	0.00859909	0.00704249	0.0115439	0.00294059	0.00458698	0.00764447	0.00409715	0.00862788	0.00623912	0.00111799
HY	PVZ	0	3.3049e-05	0	0	8.26226e-06	8.26226e-06	0.000791302	0.000543321	0.000597829	0.00162985	0.000890576	0.000252103	0.000392318	0.000148967	3.5095e-05	0.000365606	0.000235496	8.6202e-05	0.00128006	0.00380381	0.0014247	0.00281902	0.0023319	0.000600915
	PVR	0	0.00324982	0	0.000750194	0.001	0.000770503	0.0195973	0.021619	0.00300212	0.0281706	0.0180973	0.00535404	0.0285504	0.0215045	0.0171515	0.0570097	0.031054	0.00896492	0.023801	0.0530399	0.0385647	0.053387	0.0421982	0.00703794
	MEZ	0.00776708	0.00959223	0.0026628	0.0182529	0.00956875	0.00324491	0.00488269	0.0168753	0.0144171	0.0461229	0.0205745	0.00890014	0.0345734	0.0338863	0.0215014	0.0321252	0.0305216	0.0030506	0.0719253	0.0808986	0.0437246	0.0421613	0.0596774	0.00983894
	LHA	0.0861936	0.126769	0.0832052	0.214678	0.127711	0.030644	0.0914876	0.119274	0.043901	0.0661741	0.0802091	0.0162494	0.138066	0.133206	0.0948145	0.160619	0.131676	0.0136616	0.0669789	0.135925	0.0790838	0.0770301	0.0897545	0.0156158
	LPO	0.012828	0.0136538	0.00762194	0.0214037	0.0138769	0.00284205	0.00729501	0.00213089	0.00907554	0.00382521	0.00558166	0.00158471	0.0538018	0.0500883	0.0327771	0.0841336	0.0552002	0.0106772	0.0127539	0.0210045	0.024877	0.0217428	0.0200945	0.00258685
	PSTN	5.50793e-05	0.00113819	0	0.000559235	0.000438126	0.000265116	0.00176016	0.00800812	0.00130701	0.00112795	0.00305081	0.00165778	0.000357493	0.000752035	0.000323609	0.000511899	0.000486259	9.76089e-05	0.000225181	0.000781813	0.000896326	0.00063531	0.000634658	0.000146571
	TU	0	0.00112517	0	0	0.000281292	0.000281292	0.00481738	0.0200672	3.89183e-05	0.0068633	0.00794669	0.00428568	0.0045145	0.00153758	0.00529506	0.0014799	0.00320676	0.000993287	0.00533958	0.0179916	0.00331971	0.00330566	0.00748913	0.00353326
	ZI	8.39733e-05	0.00239756	0.000704225	0.0202279	0.00585343	0.00481639	0.00636286	0.0216012	0.00282374	0.012505	0.0108232	0.00411177	0.00411515	0.000836467	0.00158478	0.000570059	0.00177661	0.000808558	0.000708304	0.000642849	0.00130706	0.00179866	0.00111422	0.000272735
	HY-NA	0.00865286	0.0319048	0.00991739	0.047565	0.02451	0.00935686	0.0595009	0.0695183	0.024991	0.0417047	0.0489287	0.00983574	0.0433856	0.0367259	0.0269411	0.0419523	0.0372512	0.00372273	0.0401716	0.0568114	0.032503	0.0320779	0.0403909	0.00578075
MB	SNr	0	3.5052e-06	0	0.00166407	0.000416893	0.000415725	1.74991e-05	0	5.72964e-05	2.91182e-05	2.59784e-05	1.20328e-05	0.000205221	2.44788e-05	3.9992e-05	0.000124611	9.85758e-05	4.18067e-05	0.00290715	0.00145065	0.000476516	0.000221881	0.00126405	0.000608339
	VTA	0.0161599	0.0591989	0.0268618	0.0468694	0.0372725	0.00969102	0.00599367	0.0282538	0.0175954	0.00410413	0.0139867	0.00561342	0.0417233	0.0496478	0.0553167	0.0406364	0.046831	0.00346894	0.0508375	0.0488028	0.0505877	0.0424743	0.0481756	0.00195366
	RR	1.80588e-06	0.000908849	0.000881626	0	0.00044807	0.000258232	0.00504999	0.00624651	0.000381616	0.00361525	0.00382334	0.00126706	0.00113548	0.000298196	0.000271578	3.87097e-05	0.000435991	0.000240336	0.00099108	0.00151478	0.00376027	0.00166112	0.00198181	0.000610015
	MRN	0.0115883	0.0293175	0.0351709	0.0154076	0.0228711	0.00559648	0.120625	0.15213	0.0623418	0.0587405	0.0984594	0.0228289	0.0208358	0.0337717	0.0245243	0.0216996	0.0252078	0.00296126	0.0132771	0.0142516	0.0223873	0.0161545	0.0165176	0.00204574
	SCm	0	0.000100649	1.88152e-05	0	2.98661e-05	2.40076e-05	0.000217672	0.000281143	0.0240753	0.0418938	0.016617	0.0101256	0.000143784	5.2361e-06	0	4.09417e-05	4.74904e-05	3.33618e-05	0.00044596	0.000272335	0.000106537	0.000417633	0.000310616	7.79339e-05
	PAG	0.308448	0.105421	0.280621	0.142908	0.20935	0.0500965	0.407498	0.212394	0.48376	0.348738	0.363098	0.0573358	0.0252285	0.0112691	0.0287851	0.0163505	0.0204083	0.00401449	0.0228037	0.0234078	0.0400594	0.0346952	0.0302415	0.00426464
	PRT	0	0.000246866	0	0	6.17166e-05	6.17166e-05	0.000284254	7.36328e-05	0.0032086	0.00146311	0.0012574	0.000718669	0.00036421	1.96354e-05	0	4.55333e-05	0.000107345	8.61278e-05	0.000119548	0.000378079	0.000102022	0.000282365	0.000220503	6.6387e-05
	CUN	1.80588e-05	1.50223e-06	0.000298355	0	7.9479e-05	7.30733e-05	0.000188222	0	0	0.00247489	0.000665778	0.000604667	5.2352e-05	0	0	0	1.3088e-05	1.3088e-05	0.000140551	5.83811e-05	0.000269697	0.000246072	0.000178675	4.89485e-05
	RN	0.000794586	0.000604397	4.12142e-05	0	0.000360049	0.000199962	0.00689124	0.0215186	0.0420437	0.00513752	0.0188978	0.00854451	0.000935573	0.000282749	0.00103306	0.000145783	0.000599291	0.000224927	0.000965497	0.000633147	0.00179845	0.00115884	0.00113898	0.000245163
	VTN	0	2.40357e-05	1.79192e-06	0	6.4569e-06	5.87479e-06	0	0	0	0	0	0	0.00291922	0.0108606	0.00563091	0.00324466	0.00566385	0.00183468	0.000517865	0.00787503	0.00255332	0.00187091	0.00320428	0.00161334
	SNc	0	0.000116172	0.000106619	0.000139127	9.04796e-05	3.09216e-05	0.000880932	0.00100855	4.64858e-05	0.00076167	0.000674408	0.000215291	0.000516941	0.000173053	0.000361968	0.000131753	0.000295929	8.90972e-05	0.00109777	0.0022198	0.00104205	0.00044557	0.0012013	0.000370196
	PPN	0.00142935	0.00293285	0.000300147	0	0.00116559	0.000664604	4.09736e-05	0.000104871	0.000151349	0.00109162	0.000347204	0.000249169	0.000697091	0.000694961	0.0022571	0.000420896	0.00101751	0.000418254	0.0012289	0.00206077	0.00265688	0.0016959	0.00191061	0.000301426
	IPN	0	0.000123183	0	0.00472758	0.00121269	0.00117199	0	0	0	6.13014e-05	1.53253e-05	1.53253e-05	0.0367367	0.0437097	0.041939	0.0391891	0.0403936	0.00153319	0.340337	0.12508	0.321118	0.409344	0.29897	0.0609796
	CLI	0.0365555	0.0174875	0.0272166	0.0454317	0.0316728	0.00601547	0.000154505	0	0.000752421	0.000331794	0.00030968	0.000162401	0.00445551	0.00675352	0.00609857	0.036014	0.0133304	0.00757664	0.00482418	0.00540938	0.0179429	0.0106343	0.00970269	0.0030414
	DR	0	0	0	0	0	0	0	0	0	0	0	0	0.00188911	0.00870135	0.00591943	0.0153296	0.00795987	0.00282667	0.00737251	0.00587215	0.0163227	0.00712825	0.00917392	0.0024055
	MB-NA	0.140195	0.0449237	0.0751828	0.102591	0.0907231	0.0202636	0.0732339	0.0538613	0.101928	0.0401049	0.0672821	0.0133993	0.0717535	0.0696124	0.0509269	0.081467	0.06844	0.00638203	0.0271714	0.0482905	0.0563602	0.0429899	0.043703	0.00615801
P	P-sen	0	0.00391181	0.00168261	0	0.0013986	0.000926869	0.0123441	0.0134648	0	0.00371992	0.00738221	0.00328542	0.000122461	0	0	1.84302e-05	3.52228e-05	2.94021e-05	0.000408356	0.000551413	0.000338292	0.000715335	0.000503349	8.34245e-05
	P-mot	0.00926415	0.0172035	0.00478354	0	0.0078128	0.00365728	0.00142383	0.00516991	0.00720097	0.00255596	0.00408767	0.00130084	0.0506761	0.0805539	0.120254	0.0278309	0.0698286	0.0199757	0.0854254	0.0766366	0.0351586	0.0315413	0.0571905	0.0139004
	MR	0.000813548	0.00243862	0.00269326	0	0.00148636	0.000647131	0	0	0	9.19521e-07	2.2988e-07	2.2988e-07	0	0	0	0	0	0	0	0	0	0	0	0
	LDT	0.00667813	0.00109963	6.18213e-05	0	0.0019599	0.00159284	5.80459e-05	0	0.000576207	5.83896e-05	0.000173161	0.000135048	0.000594595	0.000882414	0.0029239	0.00034201	0.00118573	0.000589813	0.00423582	0.00257156	0.00385401	0.00272611	0.00334688	0.000411691
	NI	9.75174e-05	0.000576856	0	0	0.000168593	0.000138015	0	0	0.00112647	1.51721e-05	0.00028541	0.000280376	0.0102027	0.0317509	0.0279828	0.00723463	0.0192928	0.00618297	0.0174095	0.0213333	0.0206796	0.00569107	0.0162784	0.00363195
	PRNr	0.00333094	0.00698887	0.00858241	0.00170499	0.0051518	0.00159007	0	0	0.000125404	0.000558302	0.000170926	0.000132465	0.0262242	0.0281453	0.0436164	0.0127718	0.0276894	0.00631504	0.0380504	0.022404	0.0184452	0.0248591	0.0259397	0.00424759
	RPO	0.000512869	5.85869e-05	0	0	0.000142864	0.000124106	0	0	0	0	0	0	0.00124025	0.0157502	0.00338381	0.00399749	0.00609294	0.00327288	0.00274167	0.007927	0.00216499	0.000611251	0.00336123	0.00158702
	SLD	0	0.00174158	0.000146938	0	0.000472131	0.000424566	0	0	3.13509e-05	0.00010881	3.50402e-05	2.56762e-05	0.000164554	0.000725593	0.00188248	0.00016855	0.000735294	0.000404462	0.000287575	0.000471489	0.000244388	0.000215202	0.000304664	5.7561e-05
	P-NA	0.0473275	0.0181024	0.00854209	0	0.018493	0.010298	0.00580502	0.001939	0.00488749	0.00398658	0.00415452	0.000826546	0.0470287	0.0872629	0.135379	0.0567129	0.0815959	0.0198721	0.0590705	0.0885991	0.0568259	0.0284726	0.0582421	0.012283
MY	MY-sen	0	0.000459181	2.15031e-05	0	0.000120171	0.000113117	0	0	0	0	0	0	2.15066e-05	2.26461e-05	0.000144053	0	4.70514e-05	3.27506e-05	2.46581e-06	0	0	0	6.16453e-07	6.16453e-07
	MY-mot	0.000917386	0.0493567	0.0134672	0	0.0159353	0.0115562	6.18872e-05	0	0	0.000284438	8.65814e-05	6.75462e-05	0.00144833	0.00966937	0.0151617	0.000345454	0.0066562	0.00351627	0.000594085	0.000282203	0.000753793	0.000698177	0.000582064	0.000105291
	MY-sat	0.000243793	0.000821219	0.0022193	0	0.000821077	0.00049686	0	0	0	0.000193866	4.84664e-05	4.84664e-05	0.000294652	0.00176155	0.00630323	9.75076e-05	0.00211424	0.00144482	0.000673123	1.18407e-05	0.000437828	0.000475969	0.00039969	0.000139184
	MY-NA	5.14675e-05	0.0273716	0.00874996	0	0.00904326	0.00644624	0.000339739	3.34694e-06	0	2.75856e-05	9.2668e-05	8.25861e-05	0.00140375	0.00855998	0.00735893	2.62104e-05	0.00433722	0.00212431	0.000517204	0.000110513	0.000218003	0.000304748	0.000287617	8.62244e-05
CB	FN	0	0	0	0	0	0	0	0	0	0	0	0	0	0	0	0	0	0	0	0	0	0	0	0
	IP	0	0	0	0	0	0	0	0	0	0	0	0	0	0	0	0	0	0	0	0	0	0	0	0
	DN	0	0	0	0	0	0	0	0	0	0	0	0	0	0	0	0	0	0	0	0	0	0	0	0
	OLF	0.024271	0.0517418	0.0635944	0.0240144	0.0409054	0.00997592	0.00188777	7.69797e-05	0	0.00211888	0.00102091	0.000569375	0.00108872	0.000467976	2.61172e-05	0.00114477	0.000681896	0.000267016	0.00153607	0.00267319	0.000387542	0.000166977	0.00119095	0.000578082
	HPF	0	0.00228339	0.000339569	0.000330085	0.000738261	0.000521058	7.29842e-05	0	0	0.000400605	0.000118397	9.56291e-05	0.000187809	0	0	0.000602711	0.00019763	0.000142098	2.53186e-05	1.79255e-05	4.0262e-05	0.000461025	0.000136133	0.000108397
	CTXsp	0.0221626	0.0668342	0.00548866	0.00389282	0.0245946	0.0146734	0.00219678	0.000734096	0	0.005968	0.00222472	0.00132867	6.37378e-05	0	2.04041e-06	8.60286e-05	3.79517e-05	2.18065e-05	1.61158e-05	0	8.32578e-06	0.000197638	5.55199e-05	4.74869e-05
	fiber tracts	0.140167	0.0837533	0.12431	0.149155	0.124346	0.0144728	0.0137812	0.0168552	0.0416437	0.0193925	0.0229182	0.00634638	0.101091	0.120357	0.0988525	0.10952	0.107455	0.0048753	0.0447331	0.0577637	0.0406136	0.0365015	0.044903	0.00460444
	Others	0.0189256	0.0319089	0.0221688	0.0207244	0.0234319	0.00290246	0.0326696	0.0335542	0.0222029	0.0515356	0.0349906	0.00608764	0.021646	0.0119972	0.0121957	0.0134368	0.0148189	0.00229788	0.00708498	0.00958518	0.0106912	0.00782233	0.00879593	0.000821089

## Sheet: Comparison of outputs
Comparsion of whole-brain Outputs (p-value, One-way ANOVA)
	DR GLU vs DR GABA	MR GLU vs MR GABA
MO	0.0318035	0.807993
SS	0.263049	0.355918
ACA	0.121657	0.257253
PL	0.0867732	0.416426
ILA	0.0732308	0.796689
ORB	0.0651815	0.482839
AI	0.00638394	0.333942
RSP	0.208476	0.143834
STRd	0.641744	0.450449
ACB	0.03522	0.375281
LSX	0.0465007	0.66039
CEA	0.0658782	0.184784
STR-NA	0.347443	0.875597
SI	0.0254889	0.0111199
MA	0.173938	0.448157
MS	0.308021	0.0691696
NDB	0.150977	0.0576365
BST	0.259341	0.210019
PAL-NA	0.876017	0.00226296
VENT	0.0573594	0.240192
MED	0.16811	0.199573
MTN	0.194344	0.325362
MH	0.355918	0.115248
LH	0.355918	0.0509168
TH-NA	0.0168451	0.142727
PVZ	0.0128585	0.0135775
PVR	0.0195457	0.365948
MEZ	0.289449	0.0299426
LHA	0.219885	0.0898383
LPO	0.043536	0.0187067
PSTN	0.170656	0.431697
TU	0.124552	0.287568
ZI	0.46244	0.467084
HY-NA	0.122166	0.663999
SNr	0.383537	0.104517
VTA	0.0828268	0.747079
RR	0.0401091	0.0564624
MRN	0.0182321	0.0522527
SCm	0.152509	0.0210134
PAG	0.0899848	0.144175
PRT	0.148464	0.338165
CUN	0.372913	0.0170751
RN	0.0731675	0.155909
VTN	0.313864	0.352927
SNc	0.0363066	0.0549368
PPN	0.292761	0.133925
IPN	0.346397	0.00544558
CLI	0.00199184	0.672375
DR	/	0.754712
MB-NA	0.371847	0.0316072
P-sen	0.130178	0.00184335
P-mot	0.374287	0.622133
MR	0.0613957	/
LDT	0.306433	0.0238668
NI	0.721399	0.688852
PRNr	0.0205412	0.825801
RPO	0.293471	0.481051
SLD	0.343761	0.332432
P-NA	0.214515	0.356069
MY-sen	0.328949	0.206091
MY-mot	0.219319	0.134975
MY-sat	0.172675	0.282212
MY-NA	0.214371	0.105474
FN	/	/
IP	/	/
DN	/	/
OLF	0.00718764	0.454519
HPF	0.286336	0.742515
CTXsp	0.179737	0.748162
fiber tracts	0.000675353	8.60023e-05
Others	0.137381	0.0485712
